# Supplementary material for: Development of polycationic micelles as an efficient delivery system of antibiotics for overcoming the biological barriers to reverse multidrug resistance inEscherichia coli
Source: Royal Society of Chemistry journal article supplement (doi:10.1039/d0nr01366h), 2020-01-01
Supplement: d0nr01366h1.pdf [file d0nr01366h1.pdf]

## ***Supplementary information***

# **Development of Polycationic Micelles as an Efficient Delivery System of Antibiotics Overcoming Biological Barriers to Reverse Multidrug Resistance in *Escherichia coli***

Rong Guo<sup>a</sup>, Keke Li<sup>a</sup>, Jing Qin<sup>b</sup>, Shengli Niu<sup>c</sup>, Wei Hong<sup>a\*</sup>

*<sup>a</sup> School of Pharmacy, the Key Laboratory of Prescription Effect and Clinical Evaluation of State Administration of Traditional Chinese Medicine of China, Binzhou Medical University-Yantai Campus, Guanhai Road 346, Yantai, 264003, P. R. China.*

*<sup>b</sup> Department of Pharmaceutics, School of Pharmacy, Institutes of Integrative Medicine, Fudan University, Key Laboratory of Smart Drug Delivery, Ministry of Education, Zhangheng Road 826, Shanghai, 200433, P. R. China.*

*<sup>c</sup> Key laboratory of Zoonosis of Liaoning Province, College of Animal Science and Veterinary Medicine, Shenyang Agricultural University, Dongling Road 120, Shenyang, 110866, P.R. China.*

*\*Corresponding author. Tel./ Fax.: +86-0535-6913718*

*E-mail address: [hongwei\\_sy@163.com](mailto:hongwei_sy@163.com)*

## 1. Hemolysis test

A 1% (v/v) solution of erythrocyte was firstly prepared. Then, a total of 200  $\mu\text{L}$  rRBC solution was incubated with 200  $\mu\text{L}$  PLA-PEG-PEI (with a final lipid concentration of 4 ~ 1024  $\mu\text{g}/\text{mL}$ ) at 37°C for 2 h and then centrifuged at 1000 g at 4°C for 5 min. The supernatant was transferred to 96-well plates, and the optical density at 576 nm was measured using a Synergy H1 hybrid multi-mode microplate reader (BioTek Instruments, Inc., USA) to monitor the release of hemoglobin. The negative and positive controls were rRBCs in saline and 0.5% Triton X-100, respectively. The release of hemolysis was measured using Equation (1):

$$\text{Hemolysis (\%)} = \left[ \frac{(OD_t - OD_0)}{(OD_{100} - OD_0)} \right] \times 100\% \quad (1)$$

Where  $OD_t$  is the absorption of erythrocyte in C-LS at the concentration of t,  $OD_0$  is the absorption of erythrocyte in PBS, and  $OD_{100}$  is the absorption of erythrocyte in 0.5% Triton X-100.

## 2. Results

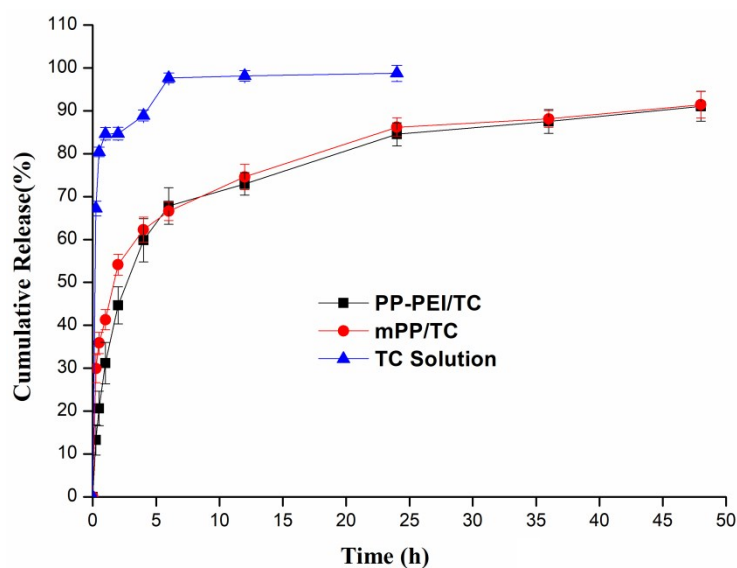

**Fig. S1** Cumulative release of TC from PP-PEI/TC and mPP/TC as a function of time at 37°C. The concentration of the copolymer was 9 mg/mL (mean $\pm$ SD, n=6).

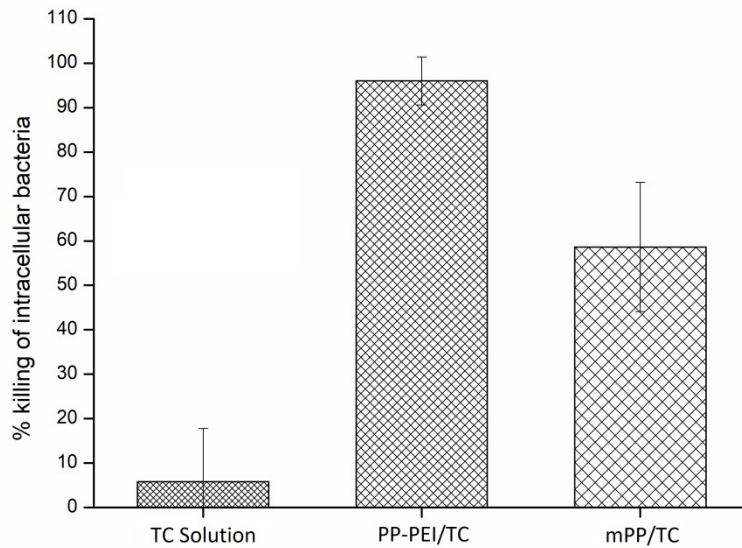

**Fig. S2** Killing of intracellular *E.coli* EB1-1 by encapsulated RAW264.7 cells infected with bacteria were incubated with free or encapsulated TC formulations at a drug dose of 4  $\mu\text{g}/\text{mL}$  for 8 h. The cells were lysed and the lysate was plated on growth medium for 12 h. The bacterial colonies were counted, and the result was expressed as percent killing compared to that for untreated control cells. Representative assay results are presented here. Each result represents the mean of triplicate assays performed together. Error bars indicate standard deviations.

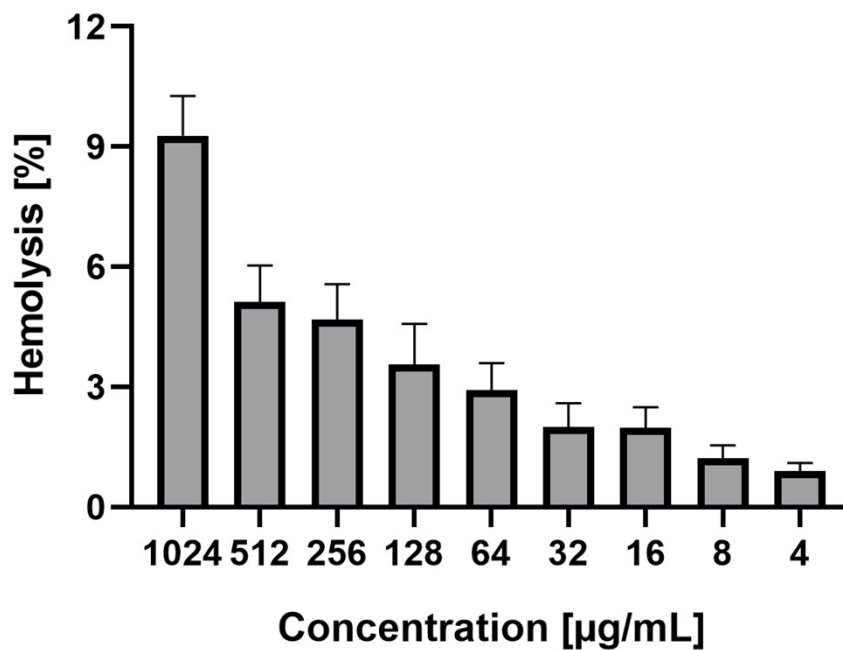

**Fig. S3.** Hemolysis behavior of PLA-PEG-PEI copolymer as a function of concentration ( $\mu\text{g}/\text{mL}$ ).
